# Supplementary material for: Gene therapy enhances deoxyribonuclease I treatment in antimyeloperoxidase glomerulonephritis
Source: JCI journal article supplement (doi:10.1172/jci.insight.188951), 2025-07-08

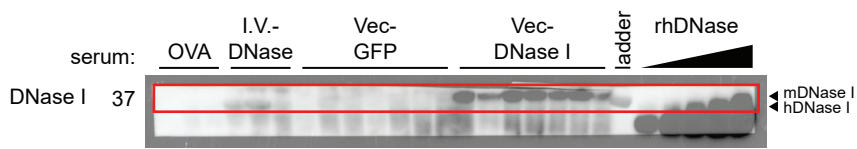

ponceau (serum):

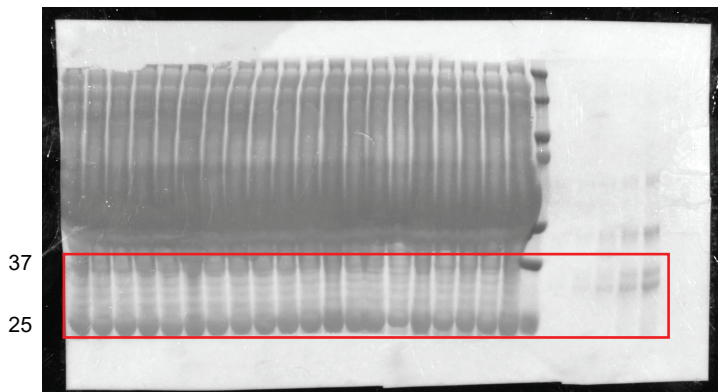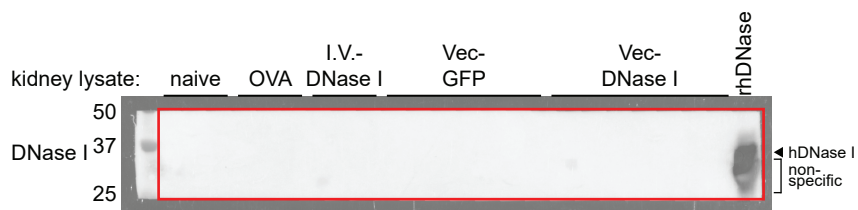

ponceau (kidney lysate):

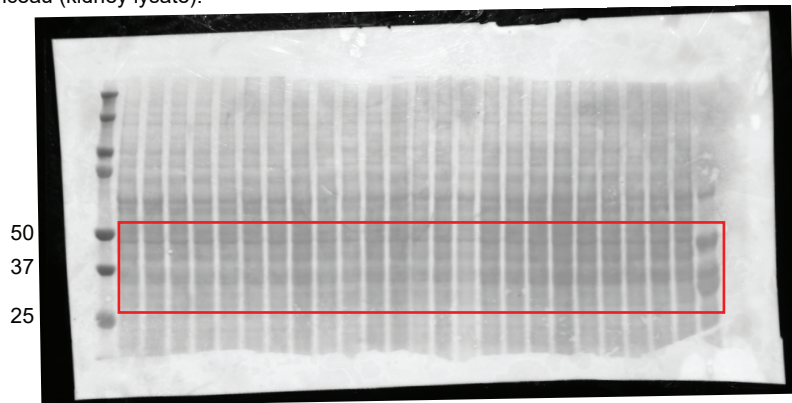

Supplement: sd2 [file 2]
